# Supplementary material
Source: PubMed Central journal article supplement (PMC4570584)
Supplement: NIHMS720900-supplement-01.pdf [file NIHMS720900-supplement-01.pdf]

## Supporting Information

### The induction of pro-angiogenic processes within a collagen scaffold via exogenous estradiol and endometrial epithelial cells

Jacquelyn C. Pence, Kathryn B.H. Clancy, Brendan A.C. Harley

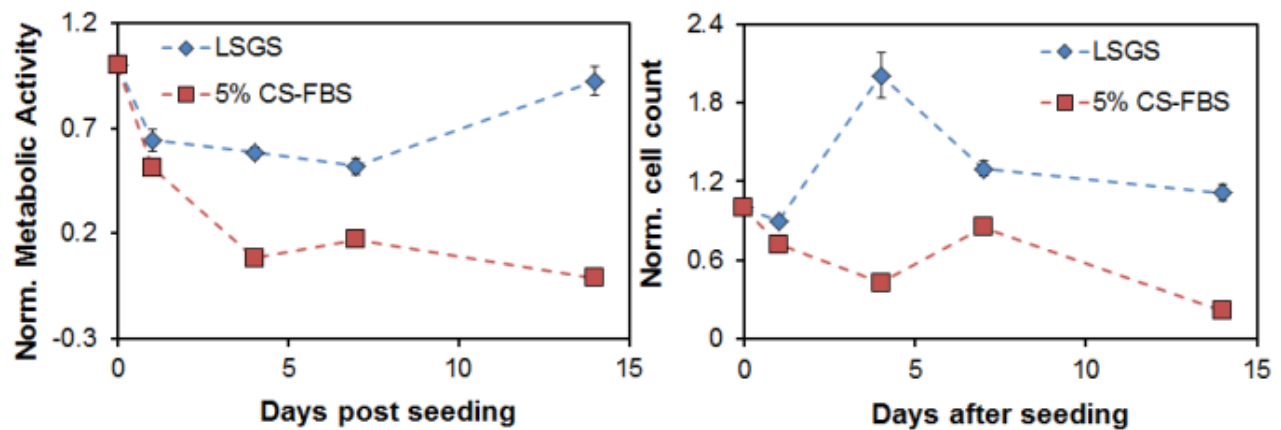

**Supplementary Figure 1. Viability of endothelial cells in epithelial cell growth media.** (A) Metabolic activity of endothelial cells grown in endothelial (LSGS) or epithelial (5% CS-FBS) growth medium over a two week culture; metabolic activity normalized to activity of total number of initially-seeded cells. (B) Endothelial cell population over a two week culture in endothelial (LSGS) or epithelial (5% CS-FBS) growth medium; total cell number normalized to total number of initially-seeded cells.

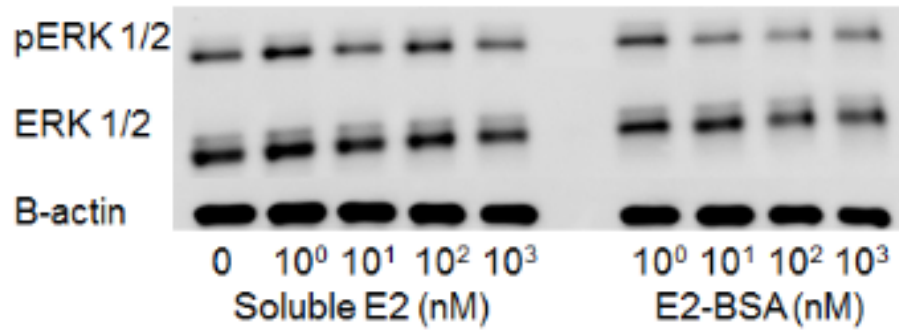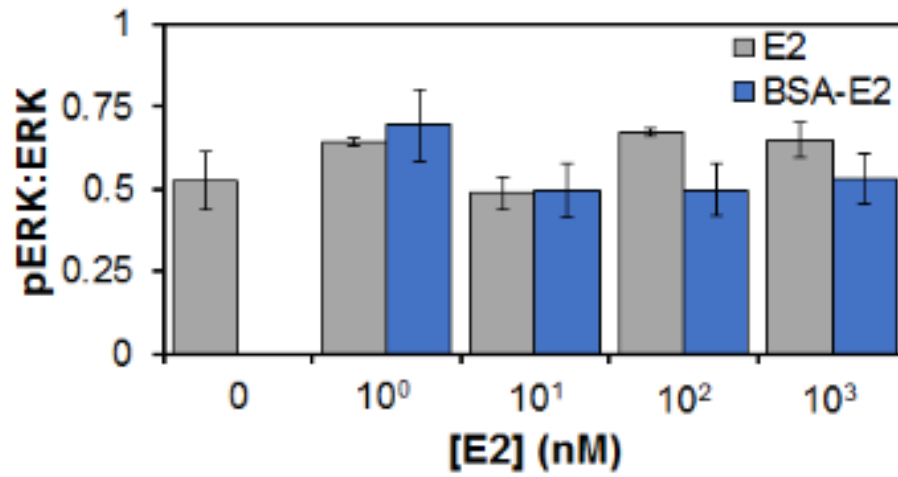

**Supplementary Figure 2. ERK1/2 phosphorylation in response to E2 presentation.** ERK 1/2 phosphorylation following 3 min treatment with 0 – 1000 nM E2 or equivalent dose of BSA-E2 immobilized to the CG scaffold.
